# Supplementary material for: Bibliometric analysis of 100 top cited articles of heart failure–associated diseases in combination with machine learning
Source: PubMed Central journal article supplement (PMC10248156; doi:10.3389/fcvm.2023.1158509), 2023-05-25
Supplement: Datasheet1.pdf [file Datasheet1.pdf]

## *Supplementary Material*

# **Bibliometric analysis of 100 top-cited articles of heart failure associated diseases in combination with machine learning**

Xuyuan Kuang<sup>1,2†</sup>, Zihao Zhong<sup>3†</sup>, Wei Liang<sup>3\*</sup>, Suzhen Huang<sup>4\*</sup>, Renji Luo<sup>3</sup>, Hui Luo<sup>2,5</sup>, Yongheng Li<sup>3</sup>

\* **Correspondence:**

Wei Liang:weiliang@csu.edu.cn

Suzhen Huang:huangsuzhen@csu.edu.cn

## **1 Supplementary Tables**

| <b>Rank</b> | <b>Title</b>                                                                                                                                                                     | <b>Total Citations</b> | <b>Average per Year</b> |
|-------------|----------------------------------------------------------------------------------------------------------------------------------------------------------------------------------|------------------------|-------------------------|
| 1           | Machine Learning in Medicine                                                                                                                                                     | 1095                   | 136.88                  |
| 2           | An artificial intelligence-enabled ECG algorithm for the identification of patients with atrial fibrillation during sinus rhythm: a retrospective analysis of outcome prediction | 385                    | 96.25                   |
| 3           | Artificial Intelligence in Precision Cardiovascular Medicine                                                                                                                     | 377                    | 62.83                   |
| 4           | Artificial Intelligence in Cardiology                                                                                                                                            | 371                    | 74.2                    |
| 5           | Using recurrent neural network models for early detection of heart failure onset                                                                                                 | 359                    | 59.83                   |
| 6           | Automated cardiovascular magnetic resonance image analysis with fully convolutional networks                                                                                     | 299                    | 59.8                    |

|    |                                                                                                                                                        |     |       |
|----|--------------------------------------------------------------------------------------------------------------------------------------------------------|-----|-------|
| 7  | Comparing different supervised machine learning algorithms for disease prediction                                                                      | 262 | 65.5  |
| 8  | Cuffless Blood Pressure Estimation Algorithms for Continuous Health-Care Monitoring                                                                    | 247 | 41.17 |
| 9  | Cardiovascular Event Prediction by Machine Learning The Multi-Ethnic Study of Atherosclerosis                                                          | 244 | 40.67 |
| 10 | Federated learning of predictive models from federated Electronic Health Records                                                                       | 227 | 45.4  |
| 11 | Prediction Modeling Using EHR Data Challenges, Strategies, and a Comparison of Machine Learning Approaches                                             | 210 | 16.15 |
| 12 | Artificial Intelligence in Cardiovascular Imaging JACC State-of-the-Art Review                                                                         | 204 | 51    |
| 13 | Machine-Learning Algorithms to Automate Morphological and Functional Assessments in 2D Echocardiography                                                | 195 | 27.86 |
| 14 | Clinical applications of machine learning in cardiovascular disease and its relevance to cardiac imaging                                               | 179 | 44.75 |
| 15 | Titin-truncating variants affect heart function in disease cohorts and the general population                                                          | 174 | 29    |
| 16 | Prediction of 30-Day All-Cause Readmissions in Patients Hospitalized for Heart Failure Comparison of Machine Learning and Other Statistical Approaches | 173 | 28.83 |
| 17 | Analysis of Machine Learning Techniques for Heart Failure Readmissions                                                                                 | 165 | 23.57 |
| 18 | Congestive heart failure detection using random forest classifier                                                                                      | 162 | 23.14 |

|    |                                                                                                                                                                               |     |       |
|----|-------------------------------------------------------------------------------------------------------------------------------------------------------------------------------|-----|-------|
| 19 | Using methods from the data-mining and machine-learning literature for disease classification and prediction: a case study examining classification of heart failure subtypes | 162 | 16.2  |
| 20 | Video-based AI for beat-to-beat assessment of cardiac function                                                                                                                | 160 | 53.33 |
| 21 | Multiscaled Fusion o Deep Convolutional Neural Networks for Screening Atrial Fibrillation From Single Lead Short ECG Recordings                                               | 141 | 28.2  |
| 22 | A Hybrid Intelligent System Framework for the Prediction of Heart Disease Using Machine Learning Algorithms                                                                   | 127 | 25.4  |
| 23 | Automated diagnosis of coronary artery disease using tunable-Q wavelet transform applied on heart rate signals                                                                | 122 | 15.25 |
| 24 | Deep learning for cardiovascular medicine: a practical primer                                                                                                                 | 114 | 28.5  |
| 25 | Machine Learning of Three-dimensional Right Ventricular Motion Enables Outcome Prediction in Pulmonary Hypertension: A Cardiac MR Imaging Study                               | 113 | 18.83 |
| 26 | Artificial Intelligence Transforms the Future of Health Care                                                                                                                  | 108 | 27    |
| 27 | Machine learning-based phenogrouping in heart failure to identify responders to cardiac resynchronization therapy                                                             | 106 | 26.5  |
| 28 | Deep-learning cardiac motion analysis for human survival prediction                                                                                                           | 104 | 26    |
| 29 | RetainVis: Visual Analytics with Interpretable and Interactive Recurrent Neural Networks on Electronic Medical Records                                                        | 104 | 26    |
| 30 | Comparison of Machine Learning Methods With Traditional Models for Use of Administrative Claims With Electronic Medical Records to Predict Heart Failure Outcomes             | 102 | 34    |

|    |                                                                                                                                                                                        |     |       |
|----|----------------------------------------------------------------------------------------------------------------------------------------------------------------------------------------|-----|-------|
| 31 | Machine learning can predict survival of patients with heart failure from serum creatinine and ejection fraction alone                                                                 | 101 | 33.67 |
| 32 | Integrated Use of Bedside Lung Ultrasound and Echocardiography in Acute Respiratory Failure A Prospective Observational Study in ICU                                                   | 100 | 11.11 |
| 33 | Machine Learning Methods Improve Prognostication, Identify Clinically Distinct Phenotypes, and Detect Heterogeneity in Response to Therapy in a Large Cohort of Heart Failure Patients | 99  | 19.8  |
| 34 | Early prediction of circulatory failure in the intensive care unit using machine learning                                                                                              | 98  | 32.67 |
| 35 | Computer-aided diagnosis of atrial fibrillation based on ECG Signals: A review                                                                                                         | 97  | 19.4  |
| 36 | A machine learning model to predict the risk of 30-day readmissions in patients with heart failure: a retrospective analysis of electronic medical records data                        | 95  | 19    |
| 37 | Phenomapping of patients with heart failure with preserved ejection fraction using machine learning-based unsupervised cluster analysis                                                | 94  | 23.5  |
| 38 | Novel Wearable Seismocardiography and Machine Learning Algorithms Can Assess Clinical Status of Heart Failure Patients                                                                 | 93  | 18.6  |
| 39 | Recent Advances in Seismocardiography                                                                                                                                                  | 88  | 22    |
| 40 | Machine Learning Prediction of Mortality and Hospitalization in Heart Failure With Preserved Ejection Fraction                                                                         | 87  | 29    |
| 41 | Machine Learning to Predict the Risk of Incident Heart Failure Hospitalization Among Patients With Diabetes: The WATCH-DM Risk Score                                                   | 83  | 20.75 |

|    |                                                                                                                                                       |    |       |
|----|-------------------------------------------------------------------------------------------------------------------------------------------------------|----|-------|
| 42 | Heart Failure: Diagnosis, Severity Estimation and Prediction of Adverse Events Through Machine Learning Techniques                                    | 82 | 13.67 |
| 43 | Machine Learning Analysis of Left Ventricular Function to Characterize Heart Failure With Preserved Ejection Fraction                                 | 80 | 16    |
| 44 | Development and validation of Risk Equations for Complications Of type 2 Diabetes (RECODE) using individual participant data from randomised trials   | 78 | 13    |
| 45 | Predictive models for hospital readmission risk: A systematic review of methods                                                                       | 77 | 15.4  |
| 46 | Adaptive neuro-fuzzy inference system for classification of ECG signals using Lyapunov exponents                                                      | 76 | 5.43  |
| 47 | Machine Learning and the Future of Cardiovascular Care JACC State-of-the-Art Review                                                                   | 75 | 37.5  |
| 48 | An integrated framework for finite-element modeling of mitral valve biomechanics from medical images: Application to MitralClip intervention planning | 75 | 6.82  |
| 49 | Derivation and Validation of Machine Learning Approaches to Predict Acute Kidney Injury after Cardiac Surgery                                         | 74 | 14.8  |
| 50 | Outlier detection for patient monitoring and alerting                                                                                                 | 74 | 7.4   |
| 51 | Decision tree for adjuvant right ventricular support in patients receiving a left ventricular assist device                                           | 74 | 6.73  |
| 52 | An Optimized Stacked Support Vector Machines Based Expert System for the Effective Prediction of Heart Failure                                        | 72 | 18    |
| 53 | Predictive modeling of hospital readmissions using metaheuristics and data mining                                                                     | 72 | 9     |

|    |                                                                                                                                                                                                                   |    |       |
|----|-------------------------------------------------------------------------------------------------------------------------------------------------------------------------------------------------------------------|----|-------|
| 54 | Application of support vector machine for prediction of medication adherence in heart failure patients.                                                                                                           | 72 | 5.54  |
| 55 | Clustervision: Visual Supervision of Unsupervised Clustering                                                                                                                                                      | 71 | 14.2  |
| 56 | Electrocardiogram analysis using a combination of statistical, geometric, and nonlinear heart rate variability features                                                                                           | 71 | 5.92  |
| 57 | Incorporating expert knowledge when learning Bayesian network structure: A medical case study                                                                                                                     | 70 | 5.83  |
| 58 | PREDICTIVE MODELING OF HOSPITAL READMISSION RATES USING ELECTRONIC MEDICAL RECORD-WIDE MACHINE LEARNING: A CASE-STUDY USING MOUNT SINAI HEART FAILURE COHORT                                                      | 69 | 11.5  |
| 59 | Recurrent neural networks employing Lyapunov exponents for analysis of ECG signals                                                                                                                                | 69 | 5.31  |
| 60 | Prediction of cardiac arrest in critically ill patients presenting to the emergency department using a machine learning score incorporating heart rate variability compared with the modified early warning score | 68 | 6.18  |
| 61 | Comprehensive electrocardiographic diagnosis based on deep learning                                                                                                                                               | 67 | 22.33 |
| 62 | Improving risk prediction in heart failure using machine learning                                                                                                                                                 | 67 | 16.75 |
| 63 | Artificial Intelligence in Health Care: Bibliometric Analysis                                                                                                                                                     | 66 | 22    |
| 64 | Discrimination power of long-term heart rate variability measures for chronic heart failure detection                                                                                                             | 65 | 5.42  |
| 65 | A Machine Learning System to Improve Heart Failure Patient Assistance                                                                                                                                             | 64 | 7.11  |

|    |                                                                                                                                         |    |       |
|----|-----------------------------------------------------------------------------------------------------------------------------------------|----|-------|
| 66 | Multiple Plasma Biomarkers for Risk Stratification in Patients With Heart Failure and Preserved Ejection Fraction                       | 62 | 20.67 |
| 67 | Predicting Survival From Large Echocardiography and Electronic Health Record Datasets Optimization With Machine Learning                | 62 | 15.5  |
| 68 | Predicting all-cause risk of 30-day hospital readmission using artificial neural networks                                               | 62 | 10.33 |
| 69 | Continuous Wearable Monitoring Analytics Predict Heart Failure Hospitalization The LINK-HF Multicenter Study                            | 60 | 20    |
| 70 | Predicting Intensive Care Unit Readmission with Machine Learning Using Electronic Health Record Data                                    | 60 | 12    |
| 71 | Using EHRs and Machine Learning for Heart Failure Survival Analysis                                                                     | 59 | 7.38  |
| 72 | Remote Health Monitoring of Heart Failure With Data Mining via CART Method on HRV Features                                              | 59 | 4.92  |
| 73 | A review of machine learning techniques in photoplethysmography for the non-invasive cuff-less measurement of blood pressure            | 58 | 19.33 |
| 74 | Predicting readmission risk with institution-specific prediction models                                                                 | 58 | 7.25  |
| 75 | PARAMO: A PARAllel predictive MOdeling platform for healthcare analytic research using electronic health records                        | 58 | 6.44  |
| 76 | Bispectral analysis and genetic algorithm for congestive heart failure recognition based on heart rate variability                      | 58 | 5.27  |
| 77 | Machine learning prediction in cardiovascular diseases: a meta-analysis                                                                 | 57 | 19    |
| 78 | Relative Prognostic Importance and Optimal Levels of Risk Factors for Mortality and Cardiovascular Outcomes in Type 1 Diabetes Mellitus | 57 | 14.25 |

|    |                                                                                                                                                                 |    |       |
|----|-----------------------------------------------------------------------------------------------------------------------------------------------------------------|----|-------|
| 79 | Prediction of Heart Disease Using a Combination of Machine Learning and Deep Learning                                                                           | 56 | 28    |
| 80 | Diagnosis of Heart Failure With Preserved Ejection Fraction: Machine Learning of Spatiotemporal Variations in Left Ventricular Deformation                      | 56 | 11.2  |
| 81 | Predicting the Risk of Heart Failure With EHR Sequential Data Modeling                                                                                          | 56 | 11.2  |
| 82 | Precision Medicine for Heart Failure with Preserved Ejection Fraction: An Overview                                                                              | 55 | 9.17  |
| 83 | An improved support vector machine-based diabetic readmission prediction                                                                                        | 54 | 10.8  |
| 84 | Machine Learning Algorithm Predicts Cardiac Resynchronization Therapy Outcomes Lessons From the COMPANION Trial                                                 | 54 | 10.8  |
| 85 | Machine learning-based mortality prediction of patients undergoing cardiac resynchronization therapy: the SEMMELWEIS-CRT score                                  | 53 | 17.67 |
| 86 | Artificial Intelligence in Cardiology: Present and Future                                                                                                       | 53 | 17.67 |
| 87 | Machine Learning-Based Three-Dimensional Echocardiographic Quantification of Right Ventricular Size and Function: Validation Against Cardiac Magnetic Resonance | 53 | 13.25 |
| 88 | Fisher score and Matthews correlation coefficient-based feature subset selection for heart disease diagnosis using support vector machines                      | 53 | 13.25 |
| 89 | Identification of novel pheno-groups in heart failure with preserved ejection fraction using machine learning                                                   | 50 | 16.67 |
| 90 | Phenotypic Clustering of Left Ventricular Diastolic Function Parameters Patterns and Prognostic Relevance                                                       | 50 | 12.5  |



|     |                                                                                                                                                            |    |       |
|-----|------------------------------------------------------------------------------------------------------------------------------------------------------------|----|-------|
| 91  | Regression trees for predicting mortality in patients with cardiovascular disease: What improvement is achieved by using ensemble-based methods?           | 50 | 4.55  |
| 92  | Developing healthcare rule-based expert systems: Case study of a heart failure telemonitoring system                                                       | 50 | 4.55  |
| 93  | Unraveling the Molecular Mechanism of Action of Empagliflozin in Heart Failure With Reduced Ejection Fraction With or Without Diabetes                     | 49 | 12.25 |
| 94  | A Multicenter, Scan-Rescan, Human and Machine Learning CMR Study to Test Generalizability and Precision in Imaging Biomarker Analysis                      | 49 | 12.25 |
| 95  | Characterising risk of in-hospital mortality following cardiac arrest using machine learning: A retrospective international registry study                 | 49 | 9.8   |
| 96  | Investigating the performance improvement of HRV Indices in CHF using feature selection methods based on backward elimination and statistical significance | 48 | 5.33  |
| 97  | Application of empirical mode decomposition (EMD) for automated identification of congestive heart failure using heart rate signals                        | 47 | 7.83  |
| 98  | A mixed-ensemble model for hospital readmission                                                                                                            | 47 | 6.71  |
| 99  | Refining Diagnostic MicroRNA Signatures by Whole-miRNome Kinetic Analysis in Acute Myocardial Infarction                                                   | 47 | 4.7   |
| 100 | Cardiac tissue engineering: state-of-the-art methods and outlook                                                                                           | 45 | 11.25 |

**Table S1** The 100 top-cited papers in heart failure and machine learning.
